# Supplementary material for: Establishment of Novel Gastric Cancer Patient-Derived Xenografts and Cell Lines: Pathological Comparison between Primary Tumor, Patient-Derived, and Cell-Line Derived Xenografts
Source: MDPI journal article supplement (doi:10.3390/cells8060585), 2019-06-14
Supplement: s1 [file s1]

Table S1 Average number of weeks of tumor growth for xenograft expansion until tumor harvesting

| Histology of primary tumor | n  | Generation of xenograft: mean $\pm$ SD (min–max) |                               |                               |                              |                             |
|----------------------------|----|--------------------------------------------------|-------------------------------|-------------------------------|------------------------------|-----------------------------|
|                            |    | 1st                                              | 2nd                           | 3rd                           | 4th                          | 5th                         |
| DA                         | 27 | 17.4 $\pm$ 14.8<br>(4.3–58.1)                    | 10.4 $\pm$ 7.7<br>(3.1–35.1)  | 7.4 $\pm$ 3.8<br>(2.9–16.0)   | 8.8 $\pm$ 7.0<br>(2.1–35.0)  | 7.2 $\pm$ 3.8<br>(2.4–19.7) |
| PDA                        | 8  | 16.8 $\pm$ 15.6<br>(8.4–57.9)                    | 20.2 $\pm$ 18.0<br>(4.0–59.7) | 14.6 $\pm$ 11.5<br>(5.0–42.0) | 13.2 $\pm$ 8.8<br>(5.9–33.0) | 9.5 $\pm$ 5.5<br>(4.1–21.0) |

DA: Differentiated adenocarcinoma, PDA: Poorly differentiated adenocarcinoma

Table S2 Pathological factors related to PDX establishment (stratified by type of immunodeficiency mouse model)

| Mouse | pT/N/M | PDX  |         | p-value |
|-------|--------|------|---------|---------|
|       |        | Fail | Success |         |
| NOG   | pT     | 1/2  | 38      | 0.62    |
|       |        | 3/4  | 7       |         |
|       | pN     | 0    | 14      | 0.02    |
|       |        | 1<   | 2       |         |
|       | pM     | 86   | 19      | 1.00    |
|       |        | 0    | 21      |         |
|       |        | 1    | 5       | 0       |
| NGS   | pT     | 1/2  | 0       | -       |
|       |        | 3/4  | 0       |         |
|       | pN     | 0    | 5       | -       |
|       |        | 1<   | 1       |         |
|       | pM     | 4    | 0       | -       |
|       |        | 0    | 0       |         |
|       |        | 1    | 5       | 0       |
| SCID  | pT     | 1/2  | 9       | 0.61    |
|       |        | 3/4  | 2       |         |
|       | pN     | 0    | 3       | 1.00    |
|       |        | 1<   | 1       |         |
|       | pM     | 24   | 4       | -       |
|       |        | 0    | 5       |         |
|       |        | 1    | 34      | 0       |

Table S3 Pathological factors related to PDX establishment (adenocarcinoma cases only, stratified by type of histological differentiation grade)

| Histology of primary tumor | pT/N/M | PDX  |         | p-value |
|----------------------------|--------|------|---------|---------|
|                            |        | Fail | Success |         |
| DA                         | pT     | 0    | 30      | 0.10    |
|                            |        | 1    | 57      |         |
|                            | pN     | 0    | 34      | 0.03    |
|                            |        | 1    | 53      |         |
|                            | pM     | 0    | 86      | 1.00    |
|                            |        | 1    | 1       |         |
| PDA                        | pT     | 1/2  | 15      | 0.20    |
|                            |        | 1    | 66      |         |
|                            | pN     | 0    | 23      | 0.44    |
|                            |        | 1    | 58      |         |
|                            | pM     | 0    | 77      | 1.00    |
|                            |        | 1    | 4       |         |

DA: Differentiated adenocarcinoma, PDA: Poorly differentiated adenocarcinoma

Table S4 PDX establishment success and tumor location

|     | PDX    |         | Success rate |
|-----|--------|---------|--------------|
|     | Failed | Success |              |
| EGJ | 8      | 2       | 20.0%        |
| U   | 41     | 4       | 8.9%         |
| M   | 44     | 5       | 10.2%        |
| L   | 79     | 14      | 15.1%        |
| N/A | 0      | 1       | 0.0%         |

EGJ: Esophagogastric-junction, U: Upper, M: Middle, L: Lower, N/A: Not available
